# Supplementary material
Source: publisher figshare collection journal article supplement (https://acs.figshare.com/ndownloader/files/3824263)
Supplement: Supplementary file 1 [file 3824263]

## Supporting Information

# **Low-temperature Processed and Carbon-based ZnO/CH<sub>3</sub>NH<sub>3</sub>PbI<sub>3</sub>/C Planar Heterojunction Perovskite Solar Cells**

Huawei Zhou,<sup>†</sup> Yantao Shi,<sup>\*,†</sup> Kai Wang,<sup>†</sup> Qingshun Dong,<sup>†</sup> Xiaogong Bai,<sup>†</sup>  
Yujin Xing,<sup>†</sup> Yi Du,<sup>†</sup> Tingli Ma<sup>\*,†,§</sup>

<sup>†</sup> State Key laboratory of Fine Chemicals, School of Chemistry, Dalian University of Technology,  
Dalian, China.

<sup>§</sup> Graduate School of Life Science and Systems Engineering, Kyushu Institute of Technology,  
2-4 Hibikino, Wakamatsu, Kitakyushu, Fukuoka, 808-0196, Japan.

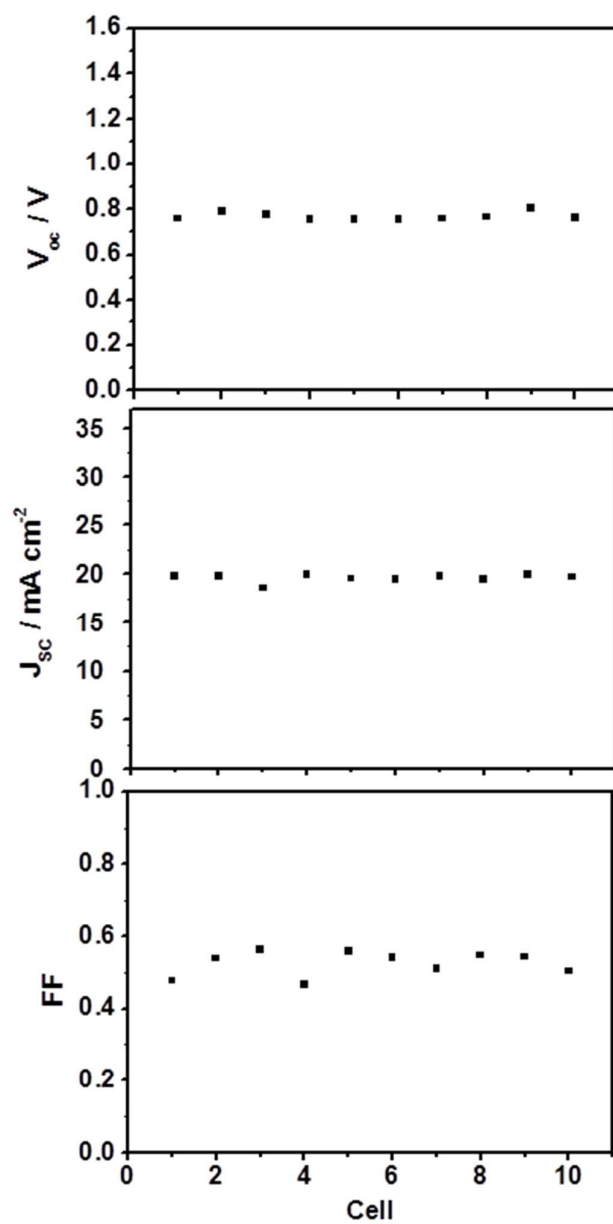

**Figure S1**  $V_{oc}$ ,  $J_{sc}$  and FF of ten ZnO/CH<sub>3</sub>NH<sub>3</sub>PbI<sub>3</sub>/C PHJ-PSCs prepared on FTO/Glass substrate and measured at a simulated AM1.5G solar irradiation of 100 mW cm<sup>-2</sup>, 0.12 cm<sup>2</sup> mask

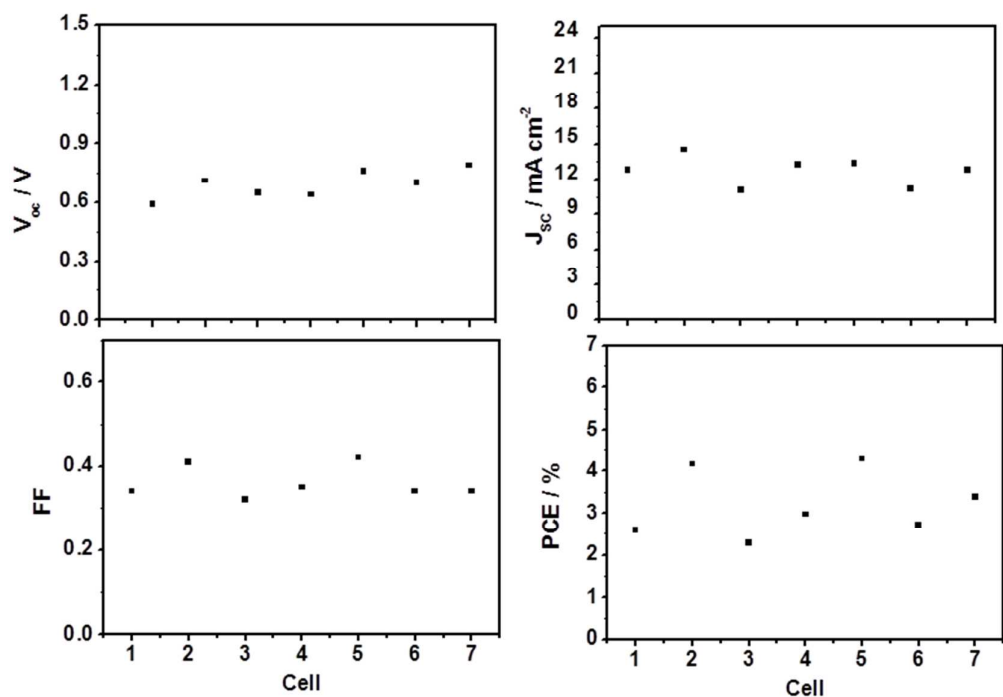

**Figure S2** Photovoltaic parameters of seven individual flexible ZnO/CH<sub>3</sub>NH<sub>3</sub>PbI<sub>3</sub>/C PHJ-PSCs

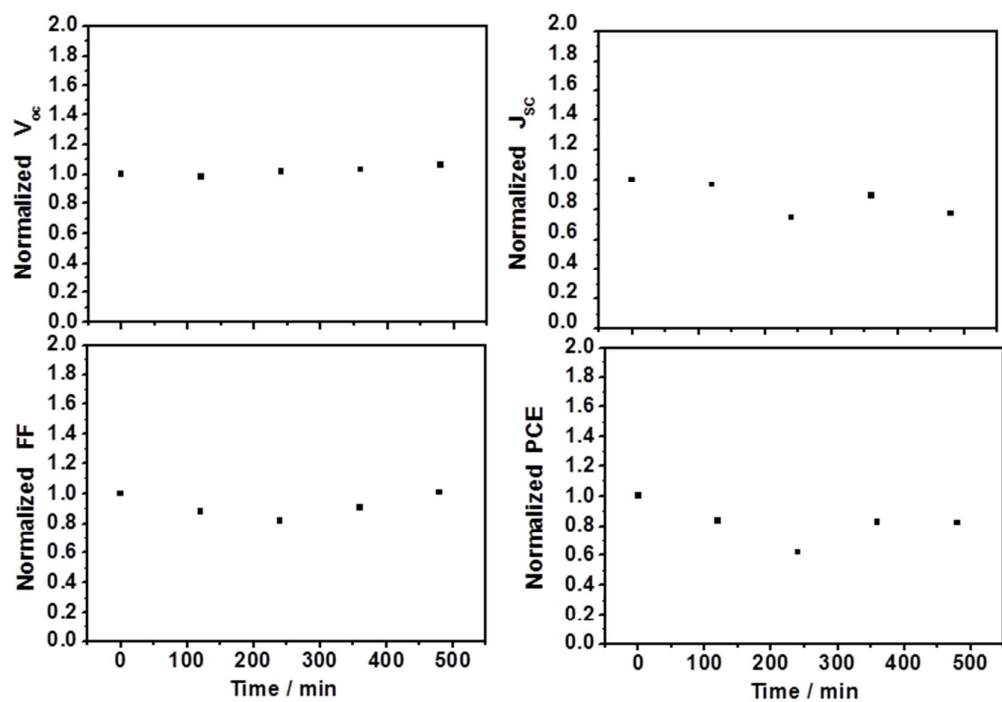

**Figure S3** Primary stability of flexible ZnO/CH<sub>3</sub>NH<sub>3</sub>PbI<sub>3</sub>/C PHJ-PSCs(25 °C, 30% humidity, without encapsulation, AM 1.5, 100 mW cm<sup>-2</sup>)
